# Supplementary material for: Fabrication of Copper(II)-Coated Magnetic Core-Shell Nanoparticles Fe3O4@SiO2: An Effective and Recoverable Catalyst for Reduction/Degradation of Environmental Pollutants
Source: MDPI journal article supplement (doi:10.3390/cryst12060862), 2022-06-18
Supplement: s1 [file s1]

## Supporting information

### Investigation of L ligand

In many carbazone ligands, enol-ketone tautomerization occurs. By tautomerization, hydrogen can bind to sulfur on a nitrogen atom adjacent to thiocarbonyl ligand, and the ligand becomes negatively charged. As shown in Scheme S1, this tautomerization can also take place in the L ligand, and as a result, the bonding of the ligand to the enolate form is observed in the formation of the complex.

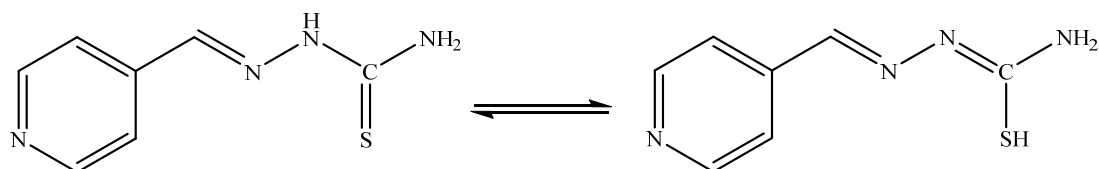

**Scheme S1.** Enol-ketone tautomerization of Schiff base L ligand.

Some physical characteristics of L ligand are given in Table S1.

**Table S1.** Some physical characteristics of L ligand

| compound | Molecular formula                              | Molar mass | color | Melting point | Yield (%) |
|----------|------------------------------------------------|------------|-------|---------------|-----------|
| L        | C <sub>7</sub> H <sub>8</sub> N <sub>4</sub> S | 180 g/mol  | cream | 200           | 80%       |

The obtained ligands were identified using FT-IR spectroscopy. Figure S1 shows the FT-IR spectrum of L ligand.

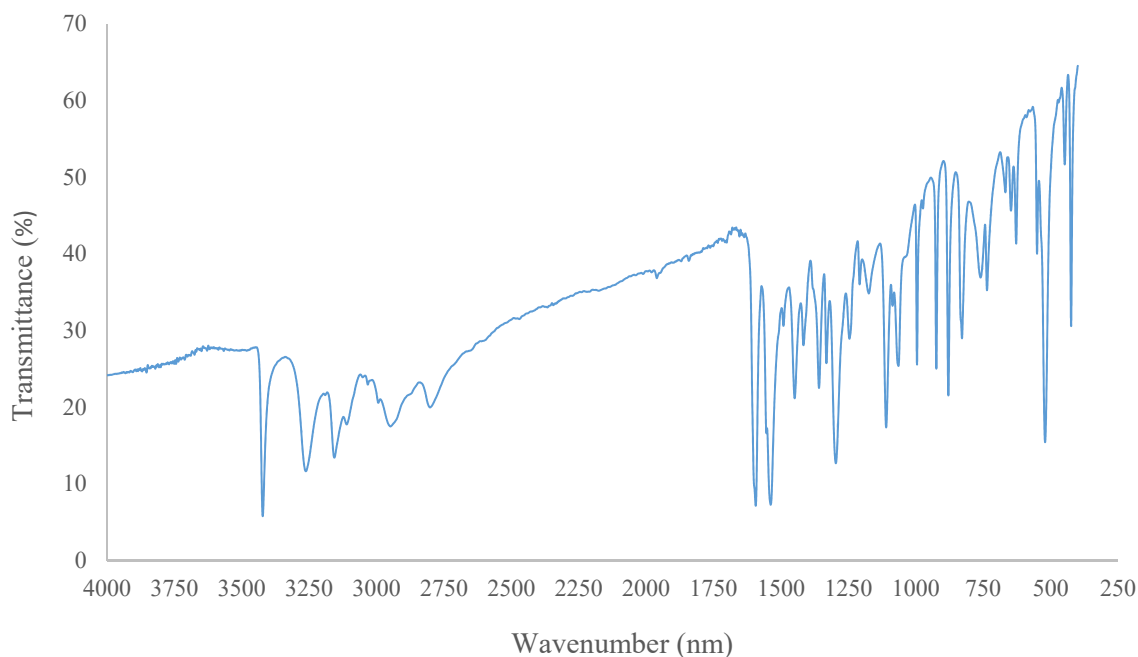

**Figure S1.** FT-IR spectrum of L ligand.

The results of FT-IR spectroscopy show that the band related to the amine tensile vibration for the L ligand in the region of  $3425.98\text{ cm}^{-1}$  is observed as a sharp band. The most important band observed in the spectrum of Schiff base L ligands belongs to the imine functional group and the hydrogen on the nitrogen atom N<sup>3</sup> of the ligands. Observing the band related to imine is proof of the formation of a Schiff base product. The band corresponding to the imine  $\nu_{\text{C=N}}$  for the L ligand is seen as a sharp band in the region of  $1602.13\text{ cm}^{-1}$ .

Due to the structure of the synthetic ligand and the observation of a hydrogen atom attached to the nitrogen of the thiosemicarbazide, it is expected that this ligand will act as a neutral ligand by retaining this hydrogen or acting as an anionic ligand by losing this hydrogen. The related band  $\nu_{\text{N-H}}$ .

For the L ligand a sharp band is observed in the  $3162.34\text{ cm}^{-1}$  region. The peak corresponding to  $\nu_{\text{C=S}}$  for the L ligand is observed in the region of  $1703.36\text{ cm}^{-1}$ . Due to the structure of the synthetic ligand, it is expected that this ligand will act as a mono-dentate or di-dentate ligand. Scheme S2 shows the coordination method of the synthetic Schiff base ligand to the metallic ion.

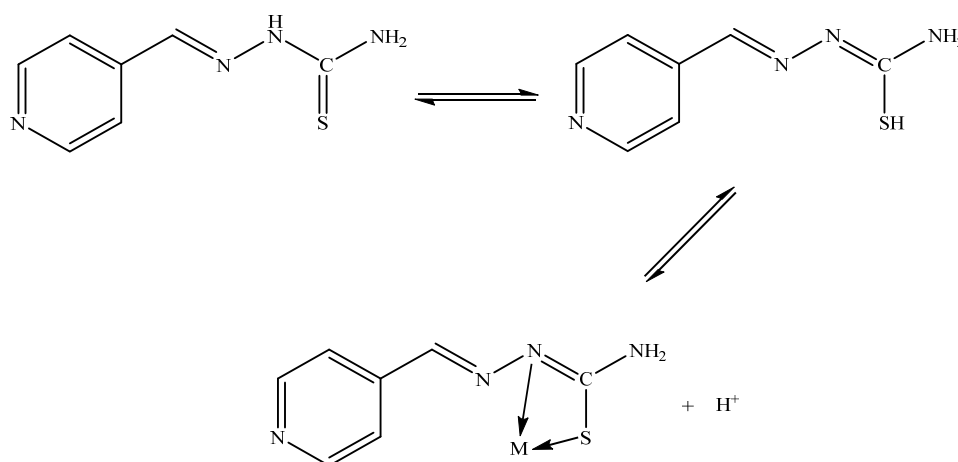

**Scheme S2.** The coordination method of the L Schiff base ligand.
