# Supplementary material for: Fabrication of Copper(II)-Coated Magnetic Core-Shell Nanoparticles Fe3O4@SiO2: An Effective and Recoverable Catalyst for Reduction/Degradation of Environmental Pollutants
Source: MDPI journal article supplement (doi:10.3390/cryst12060862), 2022-06-18
Supplement: s1 [file s1]

Archive with 1 entries (1 files):
- crystals-1673148-supplementary.pdf
